# Supplementary material for: The Role of Gut Microbiota and Environmental Factors in Type 1 Diabetes Pathogenesis
Source: PubMed Central journal article supplement (PMC7057241; doi:10.3389/fendo.2020.00078), 2020-02-26
Supplement: Table_1.pdf [file Table_1.pdf]

**Supplementary Table 1a. Taxa identified in longitudinal studies as increased in seroconverted subjects**

| <b>Phylum</b> | <b>Class</b>  | <b>Family</b>       | <b>Genus</b>         | <b>Species</b>    | <b>Study Cohort</b> | <b>Reference</b>       |
|---------------|---------------|---------------------|----------------------|-------------------|---------------------|------------------------|
| Firmicutes    | Bacilli       | Streptococcaceae    | <i>Streptococcus</i> | <i>mitis</i>      | TEDDY               | Vatanen et al., 2018   |
| Firmicutes    | Bacilli       | Streptococcaceae    | <i>Streptococcus</i> | <i>oralis</i>     | TEDDY               | Vatanen et al., 2018   |
| Firmicutes    | Bacilli       | Streptococcaceae    | <i>Streptococcus</i> | <i>pneumoniae</i> | TEDDY               | Vatanen et al., 2018   |
| Firmicutes    | Bacilli       | Erysipelotrichaceae |                      |                   | TEDDY               | Stewart et al., 2018   |
| Bacteroidetes | Bacteroidales | Bacteroidaceae      | <i>Bacteroides</i>   |                   | TRIGR-FINDIA        | de Goffau et al., 2013 |

**Supplementary Table 1b. Taxa identified in longitudinal studies as decreased in seroconverted subjects**

| Phylum         | Class          | Family             | Genus                  | Species                  | Study Cohort | Reference              |
|----------------|----------------|--------------------|------------------------|--------------------------|--------------|------------------------|
| Actinobacteria | Actinobacteria | Bifidobacteriaceae | <i>Bifidobacterium</i> |                          | FINDIA       | Vaarala et al., 2012   |
| Actinobacteria | Actinobacteria | Bifidobacteriaceae | <i>Bifidobacterium</i> | <i>adolescentis</i>      | TRIGR-FINDIA | de Goffau et al., 2013 |
| Actinobacteria | Actinobacteria | Bifidobacteriaceae | <i>Bifidobacterium</i> | <i>pseudocatenulatum</i> | TRIGR-FINDIA | de Goffau et al., 2013 |

**Supplementary Table 1c. Taxa identified in longitudinal studies as increased in healthy control subjects**

| Phylum         | Class          | Family             | Genus                  | Species             | Study Cohort | Reference            |
|----------------|----------------|--------------------|------------------------|---------------------|--------------|----------------------|
| Firmicutes     | Bacilli        | Lactobacillaceae   | <i>Lactobacillus</i>   | <i>rhamnosus</i>    | TEDDY        | Vatanen et al., 2018 |
| Actinobacteria | Actinobacteria | Bifidobacteriaceae | <i>Bifidobacterium</i> | <i>dentium</i>      | TEDDY        | Vatanen et al., 2018 |
| Firmicutes     | Bacilli        | Streptococcaceae   | <i>Streptococcus</i>   | <i>thermophilus</i> | TEDDY        | Vatanen et al., 2018 |
| Firmicutes     | Bacilli        | Streptococcaceae   | <i>Lactococcus</i>     | <i>lactis</i>       | TEDDY        | Vatanen et al., 2018 |
